# Supplementary material for: Recruitment of the m6A/m6Am demethylase FTO to target RNAs by the telomeric zinc finger protein ZBTB48
Source: PubMed Central journal article supplement (PMC11414060; doi:10.1186/s13059-024-03392-7), 2024-09-19

Fig 1

A

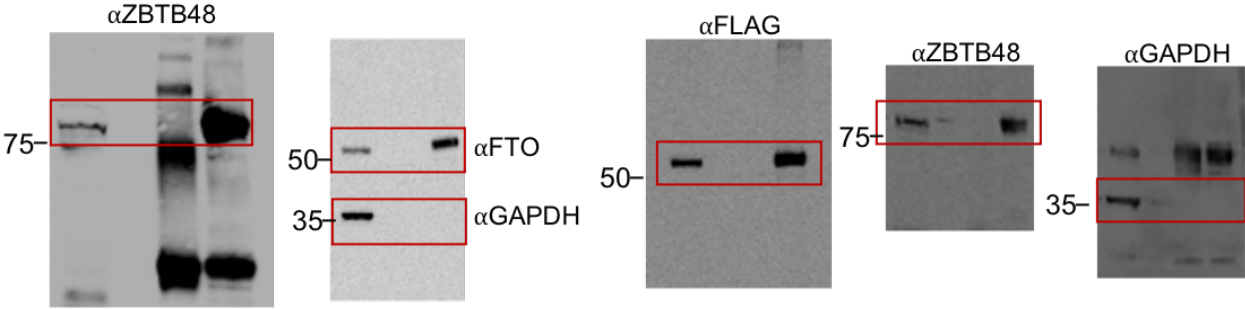

B

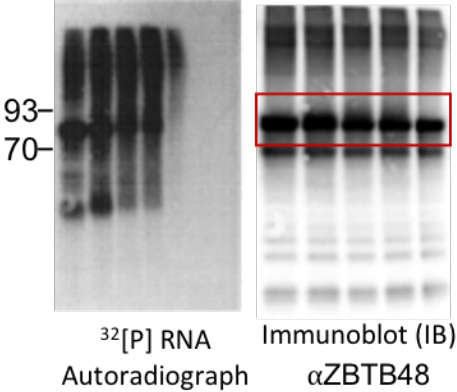

C

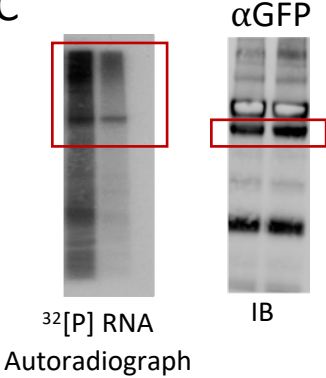

Fig 2

H

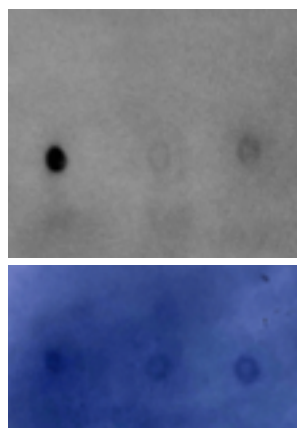

$\alpha$  m6A/Am

Methylene  
Blue

J

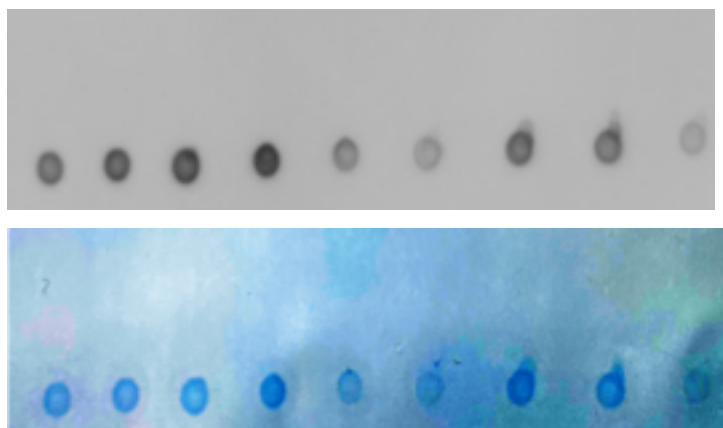

Figure 3A

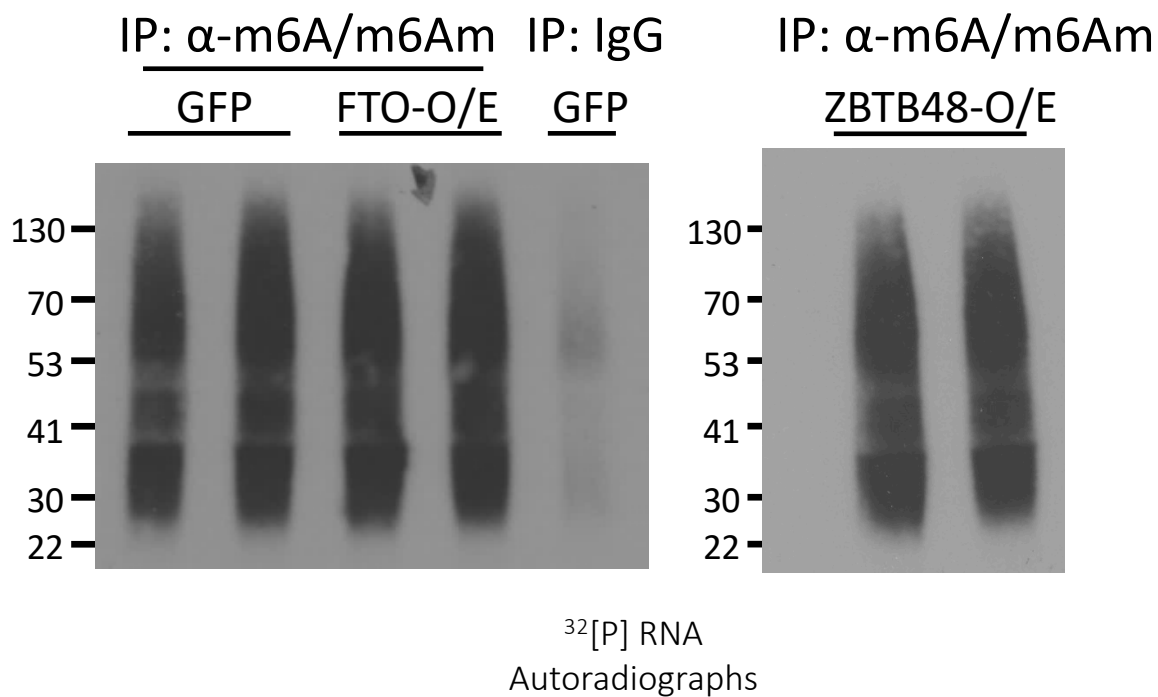

Fig 5

D

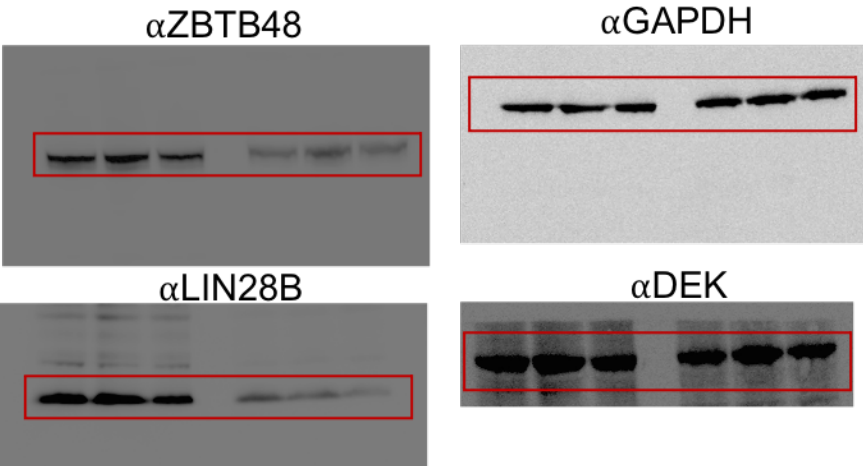

Membranes were cut based on protein sizes prior to antibody probing

H

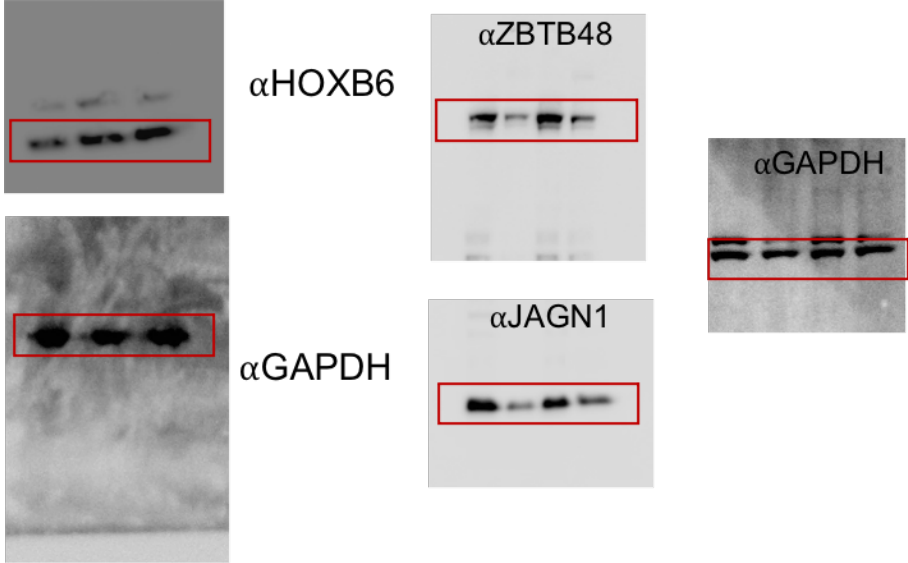

I

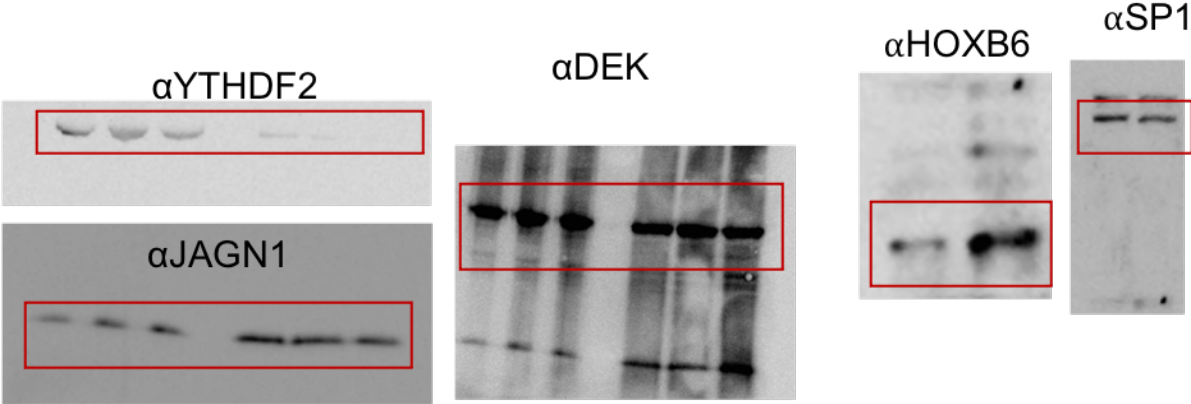

Fig 6G

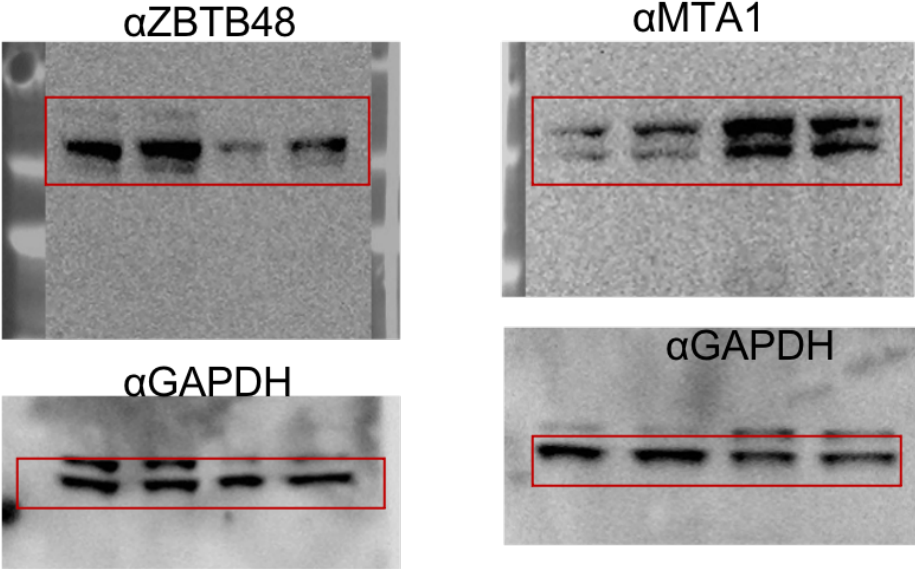

Fig S1

D

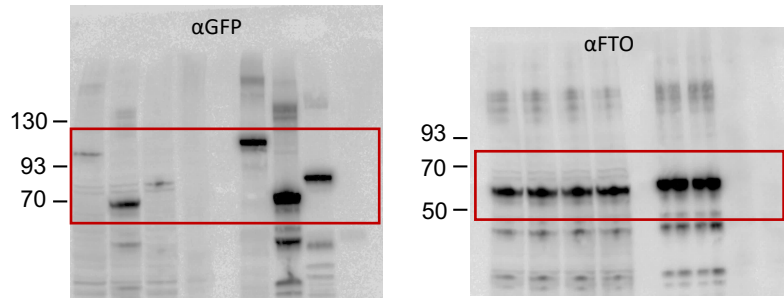

IP'd material was divided into two halves and resolved in parallel to probe for the indicated antibodies

E

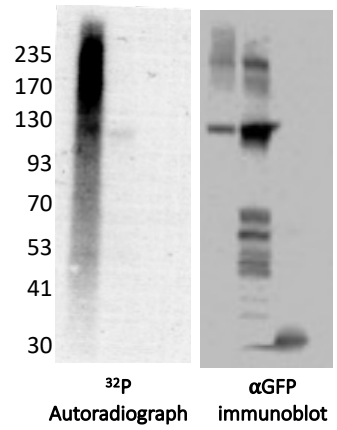

F

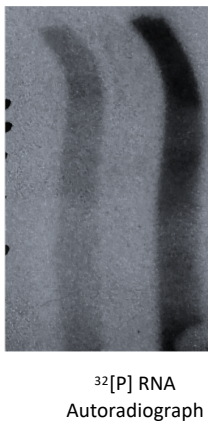

G

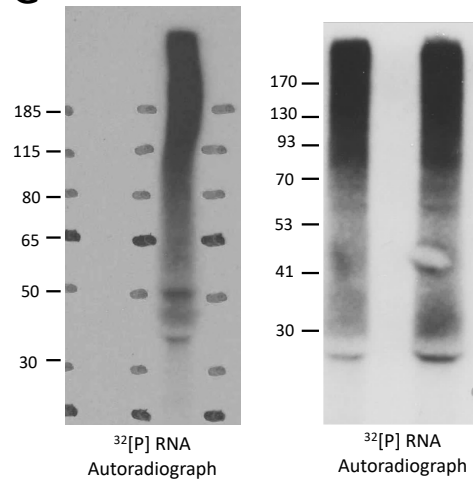

Fig S4

B

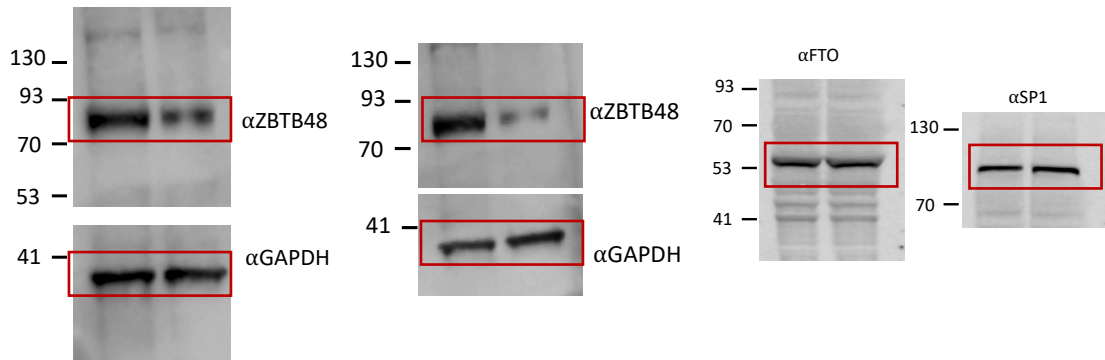

F

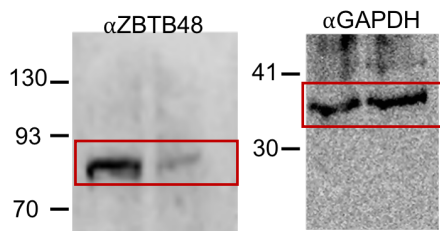

G

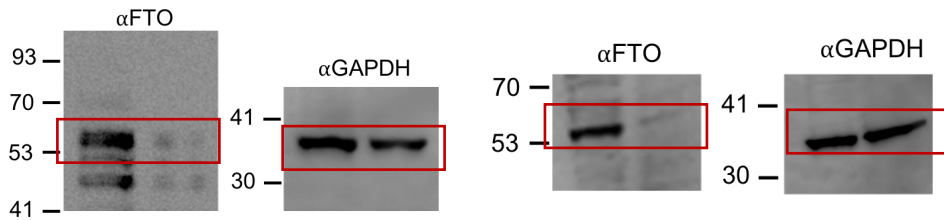

Figure S5G

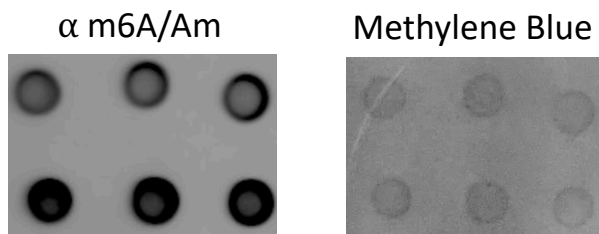

Fig S7C

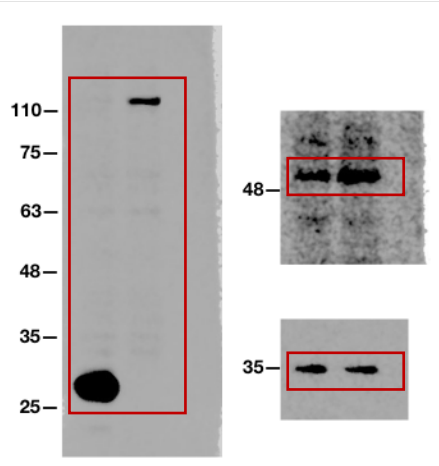

Figure S8

B

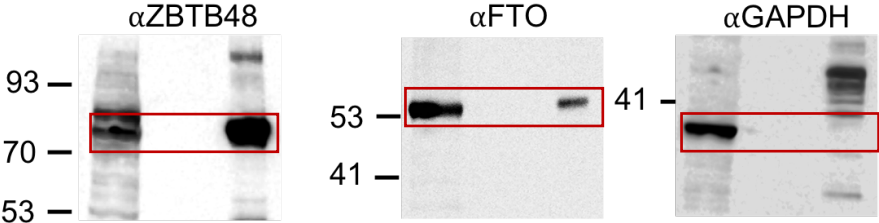

C

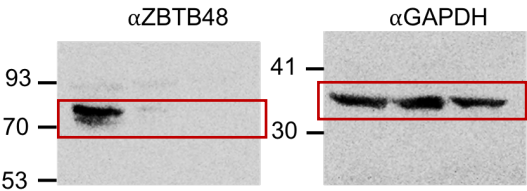

D

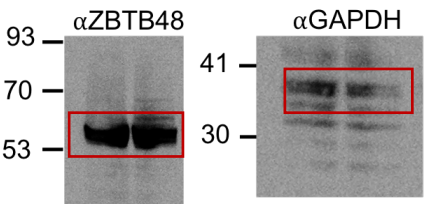

Fig S10

C

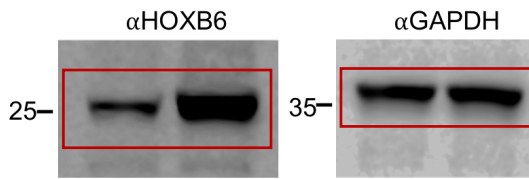

E

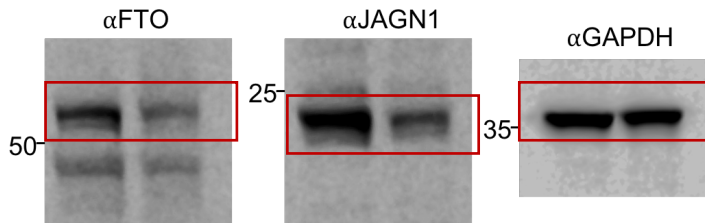

F

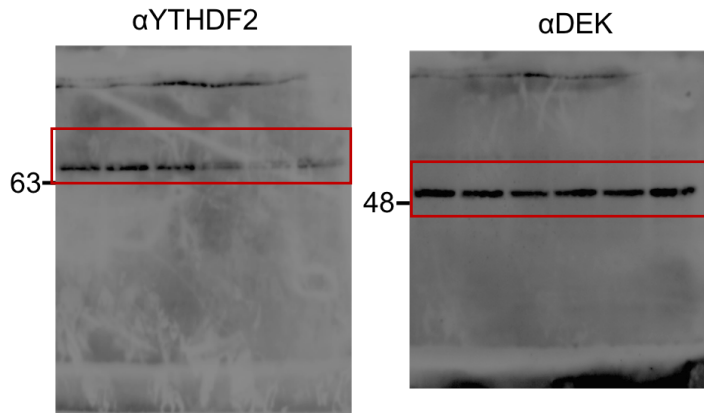



Fig S11

A

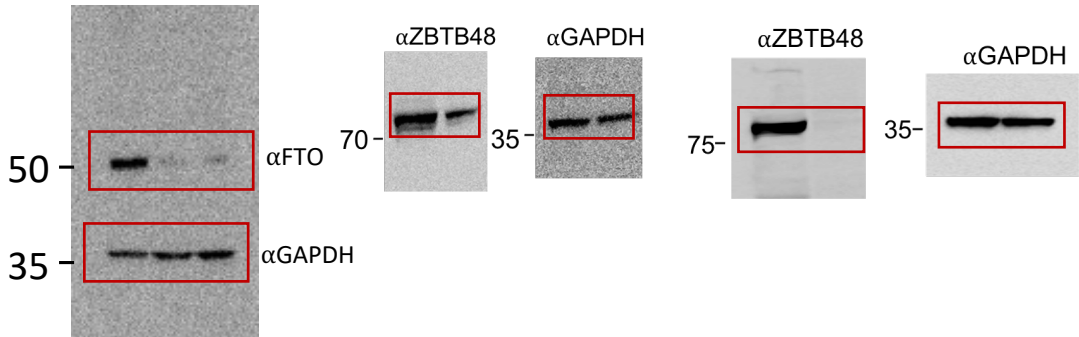

E

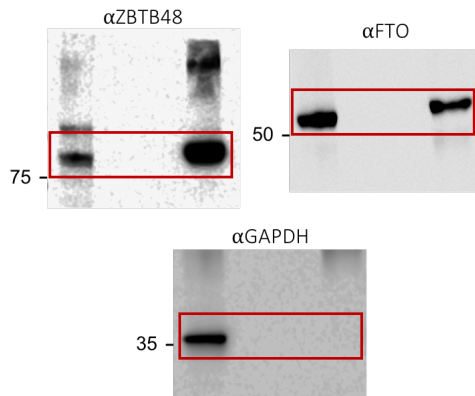

Figure S12D

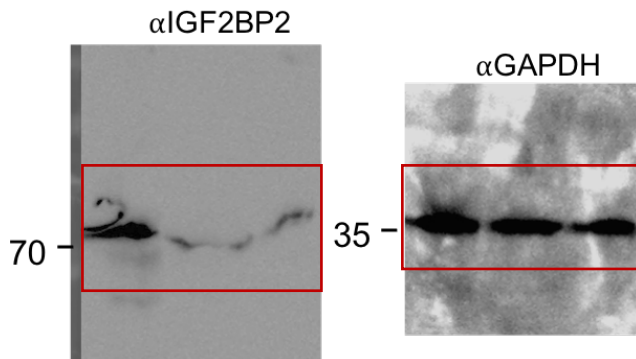

Supplement: 13059_2024_3392_MOESM13_ESM.pdf [file 13059_2024_3392_MOESM13_ESM.pdf]
